# Supplementary material
Source: PubMed Central journal article supplement (PMC6145674)
Supplement: jamapsychiatry-75-671-s001.pdf [file jamapsychiatry-75-671-s001.pdf]

## Supplementary Online Content

Raifman J, Moscoe E, Austin SB, Hatzenbuehler ML, Galea S. Association of state laws permitting denial of services to same-sex couples with mental distress in sexual minority adults: a difference-in-difference-in-differences analysis. *JAMA Psychiatry*. Published online May 23, 2018. doi: 10.1001/jamapsychiatry.2018.0757.

**eAppendix 1.** BRFSS data source citations and disclaimers

**eAppendix 2.** Selection of control states

**eTable 1.** Population characteristics in Utah and control states

**eTable 2.** Population characteristics in Michigan and potential control states

**eTable 3.** Population characteristics in North Carolina and control states

**eTable 4.** Logistic regression analysis of prior trends in mental distress among all adults in states that passed laws permitting denial of services to same-sex couples and control states, 2012-2014

**eTable 5.** Change in percent of population experiencing mental distress after implementation of laws permitting denial of services to same-sex couples

**eTable 6.** Logistic regression analysis of state laws permitting denial of services to same-sex couples and mental distress

**eTable 7.** Change in percent of population experiencing mental distress after implementation of laws permitting denial of services to same-sex couples including those aged 65 and older

**eTable 8.** Change in percent of population experiencing mental distress after implementation of laws permitting denial of services to same-sex couples excluding those unsure of their sexual orientation

**eTable 9.** Change in percent of population experiencing mental distress after implementation of laws permitting denial of services to same-sex couples including same-sex marriage laws

**eTable 10.** Change in mentally unhealthy days after implementation of laws permitting denial of services to same-sex couples \

**eFigure.** Changes in mental distress over time in states that did and did not pass laws permitting denial of services to same-sex couples, 2012-2014

This supplementary material has been provided by the authors to give readers additional information about their work.

## **eAppendix 1: BRFSS data source citations and disclaimers**

Citations of state BRFSS data sources are listed below:

1. Utah BRFSS data 2014-16: Office of Public Health Assessment. Utah Behavioral Risk Factor Surveillance System Survey Data. Salt Lake City, UT: Utah Department of Health, 2014-16.
2. Michigan BRFSS data 2014-16. Lansing, MI: Michigan Department of Health and Human Services, 2014-16.
3. North Carolina 2014-16: North Carolina State Center for Health Statistics. Raleigh, NC: North Carolina Health and Human Services, 2014-16.

State BRFSS disclaimers are listed below:

1. In addition to the above disclaimers, authors disclaim that all analyses, conclusions, and interpretations in this study do not represent those of the Utah Department of Health.

## eAppendix 2: Selection of control states

In this section of the Supplementary Appendix, we describe our selection of control states for each state that implemented a law permitting the denial of services to same-sex couples: Utah, Michigan, and North Carolina.

### Utah:

Utah's neighboring states include Idaho, Wyoming, Colorado, New Mexico, Arizona, and Nevada. Of those states, Idaho and Nevada collected data on sexual orientation in 2014-2016. We used both states as control states for Utah (eTable 1).

**eTable 1: Population characteristics in Utah and control states**

| Variable                                | Case state | Control states |             |
|-----------------------------------------|------------|----------------|-------------|
|                                         | Utah<br>%  | Idaho<br>%     | Nevada<br>% |
| Sexual orientation                      |            |                |             |
| Straight                                | 93.3       | 96.0           | 93.3        |
| Gay, lesbian, bisexual, or not sure     | 6.8        | 4.0            | 6.6         |
| Race/ethnicity                          |            |                |             |
| Non-Hispanic White                      | 80.9       | 85.8           | 54.7        |
| Non-Hispanic Black                      | 0.8        | 0.5            | 8.5         |
| Hispanic                                | 11.7       | 8.5            | 24.6        |
| Other race/ethnicity                    | 4.3        | 2.4            | 9.7         |
| Non-Hispanic multiracial                | 1.2        | 1.6            | 1.3         |
| Unknown/other                           | 1.2        | 1.3            | 1.3         |
| Educational attainment                  |            |                |             |
| Did not graduate high school            | 9.3        | 10.2           | 16.5        |
| High school graduate                    | 24.4       | 28.7           | 28.8        |
| Attended college/technical school       | 39.7       | 37.6           | 34.9        |
| Graduated from college/technical school | 26.4       | 23.2           | 19.6        |
| Not reported                            | 0.2        | 0.3            | 0.3         |
| Income group                            |            |                |             |
| < \$10,000                              | 2.6        | 3.7            | 4.6         |
| \$10,000 - \$14,999                     | 2.9        | 4.0            | 3.8         |
| \$15,000 - \$19,999                     | 4.5        | 7.1            | 6.8         |
| \$20,000 - \$24,999                     | 6.7        | 8.7            | 8.8         |
| \$25,000 - \$34,999                     | 8.2        | 11.7           | 9.7         |
| \$35,000 - \$49,999                     | 12.9       | 15.1           | 11.8        |
| \$50,000 - \$74,999                     | 16.6       | 16.5           | 12.9        |
| \$75,000 or more                        | 31.2       | 23.5           | 23.7        |
| Not reported                            | 14.4       | 9.8            | 17.9        |

**Michigan:**

Michigan's neighboring states include Wisconsin, Illinois, Indiana, and Ohio. Of these neighboring states, Ohio, Indiana, and Wisconsin collected data on sexual orientation. We compared the demographic characteristics of the populations of each state to identify the control states (eTable 2). The populations of Ohio and Indiana were most similar to Michigan with regard to sexual orientation, race/ethnicity, and income group, and we therefore chose Ohio and Indiana as control states.

**eTable 2: Population characteristics in Michigan and potential control states**

| Variable                                | Case state | Potential control states |         |           |
|-----------------------------------------|------------|--------------------------|---------|-----------|
|                                         | Michigan   | Ohio                     | Indiana | Wisconsin |
|                                         | %          | %                        | %       | %         |
| Sexual orientation                      |            |                          |         |           |
| Straight                                | 96.5       | 95.8                     | 95.5    | 95.0      |
| Gay, lesbian, bisexual, or not sure     | 3.5        | 4.2                      | 4.5     | 5.0       |
| Race/ethnicity                          |            |                          |         |           |
| Non-Hispanic White                      | 77.3       | 82.0                     | 82.9    | 86.2      |
| Non-Hispanic Black                      | 12.9       | 11.1                     | 8.0     | 4.9       |
| Hispanic                                | 3.9        | 2.4                      | 4.8     | 4.6       |
| Other race/ethnicity                    | 3.2        | 2.0                      | 1.9     | 3.0       |
| Non-Hispanic multiracial                | 1.4        | 1.2                      | 1.1     | 0.6       |
| Unknown/other                           | 1.2        | 1.4                      | 1.3     | 0.7       |
| Educational attainment                  |            |                          |         |           |
| Did not graduate high school            | 10.5       | 11.3                     | 12.6    | 9.2       |
| High school graduate                    | 29.8       | 34.3                     | 34.4    | 32.7      |
| Attended college/technical school       | 35.5       | 31.1                     | 31.3    | 33.3      |
| Graduated from college/technical school | 24.2       | 23.1                     | 21.6    | 24.8      |
| Not reported                            | <0.1       | 0.1                      | 0.2     | <0.1      |
| Income group                            |            |                          |         |           |
| < \$10,000                              | 5.5        | 4.2                      | 5.0     | 3.4       |
| \$10,000 - \$14,999                     | 4.1        | 4.1                      | 4.5     | 3.6       |
| \$15,000 - \$19,999                     | 6.2        | 6.3                      | 7.3     | 6.0       |
| \$20,000 - \$24,999                     | 8.2        | 9.1                      | 8.5     | 7.6       |
| \$25,000 - \$34,999                     | 10.3       | 9.6                      | 9.8     | 9.9       |
| \$35,000 - \$49,999                     | 13.6       | 13.2                     | 14.2    | 14.5      |
| \$50,000 - \$74,999                     | 15.0       | 14.6                     | 14.8    | 16.9      |
| \$75,000 or more                        | 27.6       | 25.1                     | 24.3    | 29.2      |
| Not reported                            | 9.6        | 13.9                     | 11.6    | 8.8       |

**North Carolina:**

North Carolina's neighboring states are Virginia, South Carolina, Tennessee, and Georgia. We selected the state of Virginia as one control state because it was the only neighboring state to North Carolina that captured data on sexual orientation using the CDC Sexual Orientation and Gender Identity Module in 2014-2016. We included the state of Delaware as an additional control state, because it is the only other BRFSS state in the mid-Atlantic region that collected sexual orientation data in all three study years. North Carolina's, Virginia's, and Delaware's populations have similar demographic characteristics (eTable 3).

**eTable 3: Population characteristics in North Carolina and control states**

| <b>Variable</b>                         | <b>Case state</b>     | <b>Control states</b> |                 |
|-----------------------------------------|-----------------------|-----------------------|-----------------|
| <b>Variable</b>                         | <b>North Carolina</b> | <b>Virginia</b>       | <b>Delaware</b> |
|                                         | <b>%</b>              | <b>%</b>              |                 |
| Sexual orientation                      |                       |                       |                 |
| Straight                                | 96.4                  | 95.3                  | 94.0            |
| Gay, lesbian, bisexual, or not sure     | 3.6                   | 4.7                   | 6.0             |
| Race/ethnicity                          |                       |                       |                 |
| Non-Hispanic White                      | 66.8                  | 65.1                  | 66.2            |
| Non-Hispanic Black                      | 20.5                  | 18.3                  | 19.3            |
| Hispanic                                | 7.3                   | 7.7                   | 7.4             |
| Other race/ethnicity                    | 3.6                   | 5.6                   | 3.8             |
| Non-Hispanic multiracial                | 1.0                   | 1.8                   | 1.5             |
| Unknown/other                           | 0.9                   | 1.4                   | 1.8             |
| Educational attainment                  |                       |                       |                 |
| Did not graduate high school            | 15.3                  | 12.4                  | 12.1            |
| High school graduate                    | 26.9                  | 25.8                  | 31.1            |
| Attended college/technical school       | 33.2                  | 30.2                  | 29.7            |
| Graduated from college/technical school | 24.4                  | 31.4                  | 26.8            |
| Not reported                            | 0.3                   | 0.2                   | 0.3             |
| Income group                            |                       |                       |                 |
| < \$10,000                              | 4.5                   | 3.2                   | 3.3             |
| \$10,000 - \$14,999                     | 5.1                   | 3.5                   | 3.4             |
| \$15,000 - \$19,999                     | 8.1                   | 5.8                   | 5.7             |
| \$20,000 - \$24,999                     | 8.5                   | 7.7                   | 8.1             |
| \$25,000 - \$34,999                     | 9.3                   | 8.3                   | 9.0             |
| \$35,000 - \$49,999                     | 11.6                  | 11.2                  | 11.8            |
| \$50,000 - \$74,999                     | 12.6                  | 13.1                  | 13.3            |
| \$75,000 or more                        | 21.7                  | 33.6                  | 29.9            |
| Not reported                            | 18.6                  | 13.7                  | 15.5            |

**eTable 4: Logistic regression analysis of prior trends in mental distress among all adults in states that passed laws permitting denial of services to same-sex couples and control states, 2012-2014 (N=159,189)**

| Variable                                                                                        | Adjusted odds ratio | 95% Confidence Interval |
|-------------------------------------------------------------------------------------------------|---------------------|-------------------------|
| <b><i>State that implemented law permitting denial of services to same-sex couples*year</i></b> | <b>1.02</b>         | <b>0.96 - 1.09</b>      |
| Year                                                                                            | 0.96**              | 0.92 - 1.00             |
| State                                                                                           |                     |                         |
| Delaware                                                                                        | Ref                 |                         |
| Idaho                                                                                           | 0.83***             | 0.73 - 0.94             |
| Indiana                                                                                         | 1.00                | 0.90 - 1.12             |
| Michigan                                                                                        | 0.96                | 0.82 - 1.13             |
| Nevada                                                                                          | 0.87*               | 0.76 - 1.01             |
| North Carolina                                                                                  | 0.84**              | 0.72 - 0.99             |
| Ohio                                                                                            | 0.99                | 0.89 - 1.10             |
| Utah                                                                                            | 0.87*               | 0.74 - 1.02             |
| Virginia                                                                                        | 0.91                | 0.82 - 1.02             |
| Race/ethnicity                                                                                  |                     |                         |
| Non-Hispanic White                                                                              | Ref                 |                         |
| Non-Hispanic Black                                                                              | 0.67***             | 0.61 - 0.72             |
| Hispanic                                                                                        | 0.78***             | 0.68 - 0.88             |
| Other race/ethnicity                                                                            | 0.78***             | 0.71 - 0.85             |
| Sex                                                                                             |                     |                         |
| Male                                                                                            | Ref                 |                         |
| Female                                                                                          | 1.54***             | 1.47 - 1.63             |
| Age group                                                                                       |                     |                         |
| 18-24                                                                                           | Ref                 |                         |
| 25-34                                                                                           | 1.06                | 0.95 - 1.17             |
| 35-44                                                                                           | 1.13**              | 1.02 - 1.26             |
| 45-54                                                                                           | 1.02                | 0.92 - 1.13             |
| 55 - 64                                                                                         | 0.76***             | 0.68 - 0.85             |
| Educational attainment                                                                          |                     |                         |
| Did not graduate high school                                                                    | Ref                 |                         |
| High school graduate                                                                            | 0.77***             | 0.71 - 0.84             |
| Attended college/technical school                                                               | 0.80***             | 0.74 - 0.88             |
| Graduated from college/technical school                                                         | 0.53***             | 0.48 - 0.58             |
| Unknown                                                                                         | 0.60*               | 0.34 - 1.08             |
| Income group                                                                                    |                     |                         |
| < \$10,000                                                                                      | Ref                 |                         |
| \$10,000 - \$14,999                                                                             | 0.90*               | 0.80 - 1.01             |
| \$15,000 - \$19,999                                                                             | 0.83***             | 0.74 - 0.92             |
| \$20,000 - \$24,999                                                                             | 0.73***             | 0.65 - 0.81             |
| \$25,000 - \$34,999                                                                             | 0.60***             | 0.53 - 0.67             |
| \$35,000 - \$49,999                                                                             | 0.53***             | 0.48 - 0.60             |
| \$50,000 - \$74,999                                                                             | 0.45***             | 0.40 - 0.50             |
| \$75,000 or more                                                                                | 0.33***             | 0.29 - 0.37             |
| Unknown                                                                                         | 0.61***             | 0.54 - 0.68             |
| Did not report                                                                                  | 0.36***             | 0.31 - 0.42             |
| Employment status                                                                               |                     |                         |
| Employed                                                                                        | Ref                 |                         |
| Self-employed                                                                                   | 1.00                | 0.91 - 1.11             |
| Out of work > 1 year                                                                            | 2.31***             | 2.08 - 2.56             |

|                       |         |             |
|-----------------------|---------|-------------|
| Out of work < 1 year  | 1.87*** | 1.67 - 2.09 |
| Homemaker             | 1.03    | 0.93 - 1.14 |
| Student               | 1.05    | 0.92 - 1.19 |
| Retired               | 1.36*** | 1.21 - 1.52 |
| Unable to work        | 4.66*** | 4.31 - 5.03 |
| Unknown               | 1.25    | 0.88 - 1.78 |
| <b>Marital status</b> |         |             |
| Married               | Ref     |             |
| Divorced              | 1.32*** | 1.23 - 1.42 |
| Widowed               | 1.36*** | 1.20 - 1.54 |
| Separated             | 1.66*** | 1.46 - 1.89 |
| Never married         | 1.14*** | 1.05 - 1.23 |
| Unmarried couple      | 1.40*** | 1.23 - 1.58 |
| Unknown               | 1.06    | 0.76 - 1.49 |
| Constant              | 0.24*** | 0.19 - 0.29 |

Notes: \*p<0.1, \*\*p<0.05, \*\*\*p<0.01. The bold and italicized estimate reflects that there was not a significant difference in baseline trends in mental distress among adults living in states that did and did not go on to implement laws permitting denial of services to same-sex couples. The estimates were adjusted for each of the variables contained in the table. The race and ethnicity categories differed from the main analysis due to different coding of race and ethnicity in 2012 relative to later years.

**eTable 5: Change in percent of population experiencing mental distress after implementation of laws permitting denial of services to same-sex couples (N=109,089)**

| Variable                                                                     | Percentage points | 95% Confidence Interval |
|------------------------------------------------------------------------------|-------------------|-------------------------|
| Law permitting denial of services to same-sex couples                        | -0.36             | -1.73 - 1.01            |
| Sexual minority                                                              | 5.14              | -1.18 - 11.47           |
| <b>Law permitting denial of services to same-sex couples*sexual minority</b> | <b>10.13**</b>    | <b>1.76 - 18.50</b>     |
| Year                                                                         |                   |                         |
| 2014                                                                         | Ref               |                         |
| 2015                                                                         | 0.40              | -0.55 - 1.36            |
| 2016                                                                         | 1.35***           | 0.46 - 2.24             |
| Year*sexual minority                                                         |                   |                         |
| 2014*sexual minority                                                         | Ref               |                         |
| 2015*sexual minority                                                         | -0.84             | -6.72 - 5.04            |
| 2016*sexual minority                                                         | 0.47              | -4.77 - 5.70            |
| State                                                                        |                   |                         |
| Delaware                                                                     | Ref               |                         |
| Idaho                                                                        | -1.77**           | -3.15 - -0.39           |
| Indiana                                                                      | 0.28              | -1.04 - 1.60            |
| Michigan                                                                     | 0.90              | -0.65 - 2.46            |
| Nevada                                                                       | 0.68              | -1.04 - 2.39            |
| North Carolina                                                               | -0.93             | -2.45 - 0.59            |
| Ohio                                                                         | 0.67              | -0.63 - 1.97            |
| Utah                                                                         | 0.00              | -1.44 - 1.44            |
| Virginia                                                                     | -0.17             | -1.40 - 1.07            |
| State*sexual minority                                                        |                   |                         |
| Delaware*sexual minority                                                     | Ref               |                         |
| Idaho*sexual minority                                                        | 3.69              | -4.30 - 11.67           |
| Indiana*sexual minority                                                      | -0.21             | -7.42 - 7.00            |
| Michigan*sexual minority                                                     | 1.77              | -7.28 - 10.82           |
| Nevada*sexual minority                                                       | 7.56*             | -0.14 - 15.27           |
| North Carolina*sexual minority                                               | -1.25             | -10.42 - 7.92           |
| Ohio*sexual minority                                                         | 4.06              | -3.20 - 11.33           |
| Utah*sexual minority                                                         | -2.11             | -10.01 - 5.79           |
| Virginia*sexual minority                                                     | 1.54              | -4.99 - 8.06            |
| Race/ethnicity                                                               |                   |                         |
| Non-Hispanic White                                                           | Ref               |                         |
| Non-Hispanic Black                                                           | -4.44***          | -5.49 - -3.40           |
| Non-Hispanic multiracial                                                     | -1.33             | -3.01 - 0.35            |
| Other race/ethnicity                                                         | 4.50***           | 1.60 - 7.41             |
| Hispanic                                                                     | -6.53***          | -7.86 - -5.20           |
| Unknown/other                                                                | -1.26             | -3.81 - 1.28            |
| Sex                                                                          |                   |                         |
| Male                                                                         | Ref               |                         |
| Female                                                                       | 4.68***           | 4.02 - 5.33             |
| Age group                                                                    |                   |                         |
| 18-24                                                                        | Ref               |                         |
| 25-34                                                                        | -0.41             | -1.94 - 1.12            |
| 35-44                                                                        | -1.14             | -2.68 - 0.41            |
| 45-54                                                                        | -2.49***          | -4.01 - -0.97           |
| 55 - 64                                                                      | -5.91***          | -7.44 - -4.38           |



|                                         |           |                |
|-----------------------------------------|-----------|----------------|
| Educational attainment                  |           |                |
| Did not graduate high school            | Ref       |                |
| High school graduate                    | -3.53***  | -5.06 - -2.00  |
| Attended college/technical school       | -2.91***  | -4.46 - -1.37  |
| Graduated from college/technical school | -6.07***  | -7.60 - -4.54  |
| Unknown                                 | -8.53***  | -12.46 - -4.60 |
| Income group                            |           |                |
| < \$10,000                              | Ref       |                |
| \$10,000 - \$14,999                     | -2.93**   | -5.80 - -0.05  |
| \$15,000 - \$19,999                     | -4.60***  | -7.24 - -1.96  |
| \$20,000 - \$24,999                     | -5.09***  | -7.59 - -2.58  |
| \$25,000 - \$34,999                     | -8.62***  | -10.99 - -6.25 |
| \$35,000 - \$49,999                     | -9.55***  | -11.88 - -7.21 |
| \$50,000 - \$74,999                     | -11.08*** | -13.38 - -8.78 |
| \$75,000 or more                        | -12.22*** | -14.51 - -9.93 |
| Unknown                                 | -9.25***  | -11.74 - -6.76 |
| Did not report                          | -11.52*** | -13.99 - -9.06 |
| Employment status                       |           |                |
| Employed                                | Ref       |                |
| Self-employed                           | -0.06     | -1.08 - 0.95   |
| Out of work > 1 year                    | 12.02***  | 9.46 - 14.58   |
| Out of work < 1 year                    | 7.95***   | 5.58 - 10.33   |
| Homemaker                               | -0.78     | -2.08 - 0.52   |
| Student                                 | 0.04      | -1.83 - 1.92   |
| Retired                                 | 2.58***   | 1.37 - 3.78    |
| Unable to work                          | 26.22***  | 24.52 - 27.92  |
| Unknown                                 | 3.01      | -0.93 - 6.95   |
| Marital status                          |           |                |
| Married                                 | Ref       |                |
| Divorced                                | 3.53***   | 2.50 - 4.56    |
| Widowed                                 | 6.28***   | 4.24 - 8.33    |
| Separated                               | 8.00***   | 5.43 - 10.57   |
| Never married                           | 0.53      | -0.48 - 1.55   |
| Unmarried couple                        | 2.99***   | 1.02 - 4.96    |
| Unknown                                 | -2.69     | -6.56 - 1.18   |
| Constant                                | 22.13***  | 18.94 - 25.33  |

Notes: \*p<0.1, \*\*p<0.05, \*\*\*p<0.01. The estimates were adjusted for each of the variables contained in the table.

**eTable 6: Logistic regression analysis of state laws permitting denial of services to same-sex couples and mental distress (N=109,089)**

| Variable                                                                     | Adjusted odds ratio | 95% Confidence Interval |
|------------------------------------------------------------------------------|---------------------|-------------------------|
| Law permitting denial of services to same-sex couples                        | 0.95                | 0.83 - 1.09             |
| Sexual minority                                                              | 1.59**              | 1.01 - 2.48             |
| <b>Law permitting denial of services to same-sex couples*sexual minority</b> | <b>1.88**</b>       | <b>1.13 - 3.13</b>      |
| Year                                                                         |                     |                         |
| 2014                                                                         | Ref                 |                         |
| 2015                                                                         | 1.05                | 0.95 - 1.16             |
| 2016                                                                         | 1.15***             | 1.05 - 1.26             |
| Year*sexual minority                                                         |                     |                         |
| 2014*sexual minority                                                         | Ref                 |                         |
| 2015*sexual minority                                                         | 0.90                | 0.62 - 1.32             |
| 2016*sexual minority                                                         | 0.98                | 0.71 - 1.36             |
| State                                                                        |                     |                         |
| Delaware                                                                     | Ref                 |                         |
| Idaho                                                                        | 0.82**              | 0.71 - 0.96             |
| Indiana                                                                      | 1.02                | 0.90 - 1.17             |
| Michigan                                                                     | 1.11                | 0.94 - 1.29             |
| Nevada                                                                       | 1.07                | 0.90 - 1.28             |
| North Carolina                                                               | 0.93                | 0.79 - 1.09             |
| Ohio                                                                         | 1.07                | 0.93 - 1.22             |
| Utah                                                                         | 1.01                | 0.87 - 1.17             |
| Virginia                                                                     | 0.97                | 0.85 - 1.10             |
| State*sexual minority                                                        |                     |                         |
| Delaware*sexual minority                                                     | Ref                 |                         |
| Idaho*sexual minority                                                        | 1.29                | 0.74 - 2.25             |
| Indiana*sexual minority                                                      | 0.89                | 0.54 - 1.47             |
| Michigan*sexual minority                                                     | 0.94                | 0.52 - 1.69             |
| Nevada*sexual minority                                                       | 1.53*               | 0.92 - 2.53             |
| North Carolina*sexual minority                                               | 0.87                | 0.47 - 1.61             |
| Ohio*sexual minority                                                         | 1.16                | 0.71 - 1.90             |
| Utah*sexual minority                                                         | 0.85                | 0.49 - 1.47             |
| Virginia*sexual minority                                                     | 1.16                | 0.72 - 1.85             |
| Race/ethnicity                                                               |                     |                         |
| Non-Hispanic White                                                           | Ref                 |                         |
| Non-Hispanic Black                                                           | 0.68***             | 0.61 - 0.75             |
| Non-Hispanic multiracial                                                     | 0.89                | 0.75 - 1.06             |
| Other race/ethnicity                                                         | 1.34***             | 1.10 - 1.63             |
| Hispanic                                                                     | 0.55***             | 0.48 - 0.64             |
| Unknown/other                                                                | 0.89                | 0.69 - 1.15             |
| Sex                                                                          |                     |                         |
| Male                                                                         | Ref                 |                         |
| Female                                                                       | 1.57***             | 1.48 - 1.68             |
| Age group                                                                    |                     |                         |
| 18-24                                                                        | Ref                 |                         |
| 25-34                                                                        | 0.98                | 0.86 - 1.11             |
| 35-44                                                                        | 0.91                | 0.80 - 1.04             |
| 45-54                                                                        | 0.80***             | 0.70 - 0.91             |
| 55 - 64                                                                      | 0.57***             | 0.50 - 0.65             |

|                                         |         |             |
|-----------------------------------------|---------|-------------|
| Educational attainment                  |         |             |
| Did not graduate high school            | Ref     |             |
| High school graduate                    | 0.77*** | 0.69 - 0.86 |
| Attended college/technical school       | 0.82*** | 0.73 - 0.91 |
| Graduated from college/technical school | 0.55*** | 0.49 - 0.62 |
| Unknown                                 | 0.34*** | 0.16 - 0.69 |
| Income group                            |         |             |
| < \$10,000                              | Ref     |             |
| \$10,000 - \$14,999                     | 0.91    | 0.78 - 1.06 |
| \$15,000 - \$19,999                     | 0.85**  | 0.73 - 0.98 |
| \$20,000 - \$24,999                     | 0.84**  | 0.72 - 0.97 |
| \$25,000 - \$34,999                     | 0.65*** | 0.56 - 0.75 |
| \$35,000 - \$49,999                     | 0.60*** | 0.52 - 0.70 |
| \$50,000 - \$74,999                     | 0.50*** | 0.43 - 0.58 |
| \$75,000 or more                        | 0.40*** | 0.34 - 0.47 |
| Unknown                                 | 0.61*** | 0.52 - 0.70 |
| Did not report                          | 0.47*** | 0.39 - 0.56 |
| Employment status                       |         |             |
| Employed                                | Ref     |             |
| Self-employed                           | 1.00    | 0.88 - 1.13 |
| Out of work > 1 year                    | 2.40*** | 2.07 - 2.78 |
| Out of work < 1 year                    | 1.88*** | 1.61 - 2.19 |
| Homemaker                               | 0.99    | 0.87 - 1.12 |
| Student                                 | 1.06    | 0.90 - 1.24 |
| Retired                                 | 1.32*** | 1.15 - 1.52 |
| Unable to work                          | 4.65*** | 4.23 - 5.11 |
| Unknown                                 | 1.34    | 0.94 - 1.91 |
| Marital status                          |         |             |
| Married                                 | Ref     |             |
| Divorced                                | 1.38*** | 1.27 - 1.51 |
| Widowed                                 | 1.68*** | 1.46 - 1.93 |
| Separated                               | 1.79*** | 1.52 - 2.11 |
| Never married                           | 1.10**  | 1.00 - 1.21 |
| Unmarried couple                        | 1.34*** | 1.15 - 1.56 |
| Unknown                                 | 0.76    | 0.48 - 1.22 |
| Constant                                | 0.21*** | 0.17 - 0.27 |

Notes: \*p<0.1, \*\*p<0.05, \*\*\*p<0.01. The estimates were adjusted for each of the variables contained in the table.

**eTable 7: Change in percent of population experiencing mental distress after implementation of laws permitting denial of services to same-sex couples including those aged 65 and older (N=166,459)**

| Variable                                                                     | Percentage points | 95% Confidence Interval |
|------------------------------------------------------------------------------|-------------------|-------------------------|
| Law permitting denial of services to same-sex couples                        | -0.16             | -1.29 - 0.97            |
| Sexual minority                                                              | 4.50              | -1.07 - 10.07           |
| <b>Law permitting denial of services to same-sex couples*sexual minority</b> | <b>8.70**</b>     | <b>1.18 - 16.22</b>     |
| Year                                                                         |                   |                         |
| 2014                                                                         | Ref               |                         |
| 2015                                                                         | 0.34              | -0.44 - 1.12            |
| 2016                                                                         | 0.97***           | 0.24 - 1.70             |
| Year*sexual minority                                                         |                   |                         |
| 2014*sexual minority                                                         | Ref               |                         |
| 2015*sexual minority                                                         | -1.25             | -6.39 - 3.88            |
| 2016*sexual minority                                                         | 0.66              | -4.02 - 5.34            |
| State                                                                        |                   |                         |
| Delaware                                                                     | Ref               |                         |
| Idaho                                                                        | -1.85***          | -2.98 - -0.73           |
| Indiana                                                                      | -0.16             | -1.24 - 0.91            |
| Michigan                                                                     | 0.33              | -0.95 - 1.61            |
| Nevada                                                                       | 0.32              | -1.08 - 1.71            |
| North Carolina                                                               | -1.09*            | -2.34 - 0.16            |
| Ohio                                                                         | 0.03              | -1.03 - 1.08            |
| Utah                                                                         | -0.35             | -1.55 - 0.84            |
| Virginia                                                                     | -0.69             | -1.70 - 0.32            |
| State*sexual minority                                                        |                   |                         |
| Delaware*sexual minority                                                     | Ref               |                         |
| Idaho*sexual minority                                                        | 3.91              | -3.26 - 11.08           |
| Indiana*sexual minority                                                      | -0.05             | -6.42 - 6.33            |
| Michigan*sexual minority                                                     | 2.45              | -5.64 - 10.55           |
| Nevada*sexual minority                                                       | 6.73*             | -0.12 - 13.58           |
| North Carolina*sexual minority                                               | -1.43             | -9.49 - 6.62            |
| Ohio*sexual minority                                                         | 4.11              | -2.13 - 10.36           |
| Utah*sexual minority                                                         | -1.97             | -8.97 - 5.02            |
| Virginia*sexual minority                                                     | 1.68              | -4.11 - 7.47            |
| Race/ethnicity                                                               |                   |                         |
| Non-Hispanic White                                                           | Ref               |                         |
| Non-Hispanic Black                                                           | -3.92***          | -4.81 - -3.02           |
| Non-Hispanic multiracial                                                     | -1.29*            | -2.82 - 0.24            |
| Other race/ethnicity                                                         | 4.55***           | 1.96 - 7.13             |
| Hispanic                                                                     | -6.03***          | -7.25 - -4.80           |
| Unknown/other                                                                | -0.76             | -2.90 - 1.37            |
| Sex                                                                          |                   |                         |
| Male                                                                         | Ref               |                         |
| Female                                                                       | 3.99***           | 3.45 - 4.53             |
| Age group                                                                    |                   |                         |
| 18-24                                                                        | Ref               |                         |
| 25-34                                                                        | -0.52             | -2.04 - 0.99            |
| 35-44                                                                        | -1.28             | -2.80 - 0.25            |
| 45-54                                                                        | -2.46***          | -3.95 - -0.96           |
| 55 - 64                                                                      | -5.57***          | -7.06 - -4.08           |

|                                         |           |                |
|-----------------------------------------|-----------|----------------|
| Educational attainment                  |           |                |
| Did not graduate high school            | Ref       |                |
| High school graduate                    | -3.15***  | -4.36 - -1.93  |
| Attended college/technical school       | -2.51***  | -3.74 - -1.27  |
| Graduated from college/technical school | -5.15***  | -6.36 - -3.93  |
| Unknown                                 | -6.10***  | -9.45 - -2.74  |
| Income group                            |           |                |
| < \$10,000                              | Ref       |                |
| \$10,000 - \$14,999                     | -3.17**   | -5.63 - -0.71  |
| \$15,000 - \$19,999                     | -5.13***  | -7.40 - -2.85  |
| \$20,000 - \$24,999                     | -5.58***  | -7.75 - -3.41  |
| \$25,000 - \$34,999                     | -8.47***  | -10.54 - -6.40 |
| \$35,000 - \$49,999                     | -9.38***  | -11.43 - -7.32 |
| \$50,000 - \$74,999                     | -10.74*** | -12.78 - -8.69 |
| \$75,000 or more                        | -11.93*** | -13.97 - -9.88 |
| Unknown                                 | -8.65***  | -10.83 - -6.47 |
| Did not report                          | -10.83*** | -12.92 - -8.73 |
| Employment status                       |           |                |
| Employed                                | Ref       |                |
| Self-employed                           | 0.18      | -0.74 - 1.09   |
| Out of work > 1 year                    | 12.07***  | 9.64 - 14.51   |
| Out of work < 1 year                    | 8.05***   | 5.74 - 10.36   |
| Homemaker                               | 0.17      | -0.95 - 1.28   |
| Student                                 | 0.12      | -1.75 - 1.98   |
| Retired                                 | 2.54***   | 1.79 - 3.30    |
| Unable to work                          | 25.64***  | 24.12 - 27.16  |
| Unknown                                 | 2.83      | -0.60 - 6.25   |
| Marital status                          |           |                |
| Married                                 | Ref       |                |
| Divorced                                | 3.11***   | 2.27 - 3.95    |
| Widowed                                 | 1.13***   | 0.28 - 1.99    |
| Separated                               | 7.66***   | 5.28 - 10.03   |
| Never married                           | 0.47      | -0.48 - 1.41   |
| Unmarried couple                        | 2.99***   | 1.10 - 4.88    |
| Unknown                                 | -2.34     | -5.64 - 0.96   |
| Constant                                | 22.45***  | 19.64 - 25.27  |

Notes: \*p<0.1, \*\*p<0.05, \*\*\*p<0.01. Notes: \*p<0.1, \*\*p<0.05, \*\*\*p<0.01. The estimates were adjusted for each of the variables contained in the table.

**eTable 8: Change in percent of population experiencing mental distress after implementation of laws permitting denial of services to same-sex couples excluding those unsure of their sexual orientation (N=108,322)**

| Variable                                                                     | Percentage points | 95% Confidence Interval |
|------------------------------------------------------------------------------|-------------------|-------------------------|
| Law permitting denial of services to same-sex couples                        | -0.37             | -1.74 - 0.99            |
| Sexual minority                                                              | 9.72**            | 2.32 - 17.12            |
| <b>Law permitting denial of services to same-sex couples*sexual minority</b> | <b>9.75**</b>     | <b>0.42 - 19.09</b>     |
| Year                                                                         |                   |                         |
| 2014                                                                         | Ref               |                         |
| 2015                                                                         | 0.41              | -0.55 - 1.37            |
| 2016                                                                         | 1.36***           | 0.47 - 2.25             |
| Year*sexual minority                                                         |                   |                         |
| 2014*sexual minority                                                         | Ref               |                         |
| 2015*sexual minority                                                         | -2.52             | -9.15 - 4.11            |
| 2016*sexual minority                                                         | 0.77              | -5.23 - 6.76            |
| State                                                                        |                   |                         |
| Delaware                                                                     | Ref               |                         |
| Idaho                                                                        | -1.77**           | -3.15 - -0.39           |
| Indiana                                                                      | 0.30              | -1.02 - 1.62            |
| Michigan                                                                     | 0.95              | -0.61 - 2.50            |
| Nevada                                                                       | 0.50              | -1.21 - 2.22            |
| North Carolina                                                               | -0.95             | -2.47 - 0.56            |
| Ohio                                                                         | 0.71              | -0.59 - 2.02            |
| Utah                                                                         | -0.00             | -1.44 - 1.44            |
| Virginia                                                                     | -0.18             | -1.41 - 1.06            |
| State*sexual minority                                                        |                   |                         |
| Delaware*sexual minority                                                     | Ref               |                         |
| Idaho*sexual minority                                                        | -0.28             | -9.54 - 8.98            |
| Indiana*sexual minority                                                      | -0.87             | -9.31 - 7.56            |
| Michigan*sexual minority                                                     | -2.75             | -12.71 - 7.22           |
| Nevada*sexual minority                                                       | 8.22*             | -0.94 - 17.38           |
| North Carolina*sexual minority                                               | -3.10             | -13.50 - 7.29           |
| Ohio*sexual minority                                                         | 1.15              | -7.10 - 9.39            |
| Utah*sexual minority                                                         | -1.28             | -10.47 - 7.91           |
| Virginia*sexual minority                                                     | 1.13              | -6.60 - 8.86            |
| Race/ethnicity                                                               |                   |                         |
| Non-Hispanic White                                                           | Ref               |                         |
| Non-Hispanic Black                                                           | -4.42***          | -5.46 - -3.37           |
| Non-Hispanic multiracial                                                     | -0.99             | -2.70 - 0.72            |
| Other race/ethnicity                                                         | 4.33***           | 1.43 - 7.23             |
| Hispanic                                                                     | -5.93***          | -7.28 - -4.57           |
| Unknown/other                                                                | -0.86             | -3.44 - 1.71            |
| Sex                                                                          |                   |                         |
| Male                                                                         | Ref               |                         |
| Female                                                                       | 4.67***           | 4.01 - 5.32             |
| Age group                                                                    |                   |                         |
| 18-24                                                                        | Ref               |                         |
| 25-34                                                                        | -0.33             | -1.87 - 1.20            |
| 35-44                                                                        | -1.01             | -2.57 - 0.54            |
| 45-54                                                                        | -2.34***          | -3.87 - -0.82           |
| 55 - 64                                                                      | -5.76***          | -7.30 - -4.23           |

|                                         |           |                 |
|-----------------------------------------|-----------|-----------------|
| Educational attainment                  |           |                 |
| Did not graduate high school            | Ref       |                 |
| High school graduate                    | -3.88***  | -5.44 - -2.33   |
| Attended college/technical school       | -3.32***  | -4.89 - -1.75   |
| Graduated from college/technical school | -6.48***  | -8.03 - -4.93   |
| Unknown                                 | -8.68***  | -12.70 - -4.67  |
| Income group                            |           |                 |
| < \$10,000                              | Ref       |                 |
| \$10,000 - \$14,999                     | -2.85*    | -5.75 - 0.04    |
| \$15,000 - \$19,999                     | -4.62***  | -7.29 - -1.95   |
| \$20,000 - \$24,999                     | -5.14***  | -7.67 - -2.62   |
| \$25,000 - \$34,999                     | -8.61***  | -11.00 - -6.22  |
| \$35,000 - \$49,999                     | -9.68***  | -12.03 - -7.33  |
| \$50,000 - \$74,999                     | -11.16*** | -13.48 - -8.84  |
| \$75,000 or more                        | -12.32*** | -14.63 - -10.01 |
| Unknown                                 | -9.13***  | -11.65 - -6.62  |
| Did not report                          | -11.57*** | -14.05 - -9.08  |
| Employment status                       |           |                 |
| Employed                                | Ref       |                 |
| Self-employed                           | -0.11     | -1.12 - 0.91    |
| Out of work > 1 year                    | 11.91***  | 9.34 - 14.48    |
| Out of work < 1 year                    | 7.88***   | 5.50 - 10.27    |
| Homemaker                               | -0.68     | -1.99 - 0.64    |
| Student                                 | 0.01      | -1.88 - 1.89    |
| Retired                                 | 2.56***   | 1.35 - 3.77     |
| Unable to work                          | 26.14***  | 24.44 - 27.85   |
| Unknown                                 | 3.06      | -0.95 - 7.07    |
| Marital status                          |           |                 |
| Married                                 | Ref       |                 |
| Divorced                                | 3.40***   | 2.37 - 4.43     |
| Widowed                                 | 6.15***   | 4.10 - 8.19     |
| Separated                               | 8.16***   | 5.55 - 10.77    |
| Never married                           | 0.36      | -0.67 - 1.38    |
| Unmarried couple                        | 2.92***   | 0.93 - 4.92     |
| Unknown                                 | -2.81     | -6.71 - 1.08    |
| Constant                                | 22.44***  | 19.22 - 25.65   |

Notes: \*p<0.1, \*\*p<0.05, \*\*\*p<0.01. Notes: \*p<0.1, \*\*p<0.05, \*\*\*p<0.01. The estimates were adjusted for each of the variables contained in the table.

**eTable 9: Change in percent of population experiencing mental distress after implementation of laws permitting denial of services to same-sex couples including same-sex marriage laws (N=109,089)**

| Variable                                                                     | Percentage points | 95% Confidence Interval |
|------------------------------------------------------------------------------|-------------------|-------------------------|
| Law permitting denial of services to same-sex couples                        | -0.37             | -1.74 - 1.00            |
| Sexual minority                                                              | 5.28              | -2.28 - 12.84           |
| <b>Law permitting denial of services to same-sex couples*sexual minority</b> | <b>10.14**</b>    | <b>1.77 - 18.51</b>     |
| Same-sex marriage                                                            | 0.37              | -1.38 - 2.12            |
| Same-sex marriage*sexual minority                                            | -0.28             | -11.17 - 10.62          |
| Year                                                                         |                   |                         |
| 2014                                                                         | Ref               |                         |
| 2015                                                                         | 0.18              | -1.39 - 1.75            |
| 2016                                                                         | 0.99              | -0.93 - 2.91            |
| Year*sexual minority                                                         |                   |                         |
| 2014*sexual minority                                                         | Ref               |                         |
| 2015*sexual minority                                                         | -0.68             | -10.75 - 9.40           |
| 2016*sexual minority                                                         | 0.73              | -11.18 - 12.64          |
| State                                                                        |                   |                         |
| Delaware                                                                     | Ref               |                         |
| Idaho                                                                        | -1.64**           | -3.15 - -0.13           |
| Indiana                                                                      | 0.41              | -1.08 - 1.90            |
| Michigan                                                                     | 1.08              | -0.67 - 2.83            |
| Nevada                                                                       | 0.81              | -1.04 - 2.66            |
| North Carolina                                                               | -0.75             | -2.46 - 0.96            |
| Ohio                                                                         | 0.92              | -0.82 - 2.66            |
| Utah                                                                         | 0.18              | -1.46 - 1.83            |
| Virginia                                                                     | -0.04             | -1.43 - 1.34            |
| State*sexual minority                                                        |                   |                         |
| Delaware*sexual minority                                                     | Ref               |                         |
| Idaho*sexual minority                                                        | 3.59              | -5.08 - 12.25           |
| Indiana*sexual minority                                                      | -0.31             | -8.45 - 7.83            |
| Michigan*sexual minority                                                     | 1.63              | -8.32 - 11.58           |
| Nevada*sexual minority                                                       | 7.47*             | -0.97 - 15.90           |
| North Carolina*sexual minority                                               | -1.39             | -11.45 - 8.67           |
| Ohio*sexual minority                                                         | 3.87              | -5.88 - 13.63           |
| Utah*sexual minority                                                         | -2.25             | -11.17 - 6.67           |
| Virginia*sexual minority                                                     | 1.44              | -5.95 - 8.83            |
| Race/ethnicity                                                               |                   |                         |
| Non-Hispanic White                                                           | Ref               |                         |
| Non-Hispanic Black                                                           | -4.44***          | -5.49 - -3.40           |
| Non-Hispanic multiracial                                                     | -1.33             | -3.01 - 0.35            |
| Other race/ethnicity                                                         | 4.50***           | 1.60 - 7.41             |
| Hispanic                                                                     | -6.53***          | -7.86 - -5.20           |
| Unknown/other                                                                | -1.27             | -3.81 - 1.27            |
| Sex                                                                          |                   |                         |
| Male                                                                         | Ref               |                         |
| Female                                                                       | 4.68***           | 4.02 - 5.33             |
| Age group                                                                    |                   |                         |
| 18-24                                                                        | Ref               |                         |
| 25-34                                                                        | -0.41             | -1.94 - 1.12            |
| 35-44                                                                        | -1.14             | -2.68 - 0.41            |



|                                         |           |                |
|-----------------------------------------|-----------|----------------|
| 45-54                                   | -2.49***  | -4.01 - -0.97  |
| 55 - 64                                 | -5.91***  | -7.44 - -4.38  |
| Educational attainment                  |           |                |
| Did not graduate high school            | Ref       |                |
| High school graduate                    | -3.53***  | -5.06 - -1.99  |
| Attended college/technical school       | -2.91***  | -4.46 - -1.37  |
| Graduated from college/technical school | -6.07***  | -7.59 - -4.54  |
| Unknown                                 | -8.54***  | -12.47 - -4.60 |
| Income group                            |           |                |
| < \$10,000                              | Ref       |                |
| \$10,000 - \$14,999                     | -2.93**   | -5.80 - -0.06  |
| \$15,000 - \$19,999                     | -4.60***  | -7.24 - -1.95  |
| \$20,000 - \$24,999                     | -5.09***  | -7.59 - -2.58  |
| \$25,000 - \$34,999                     | -8.62***  | -10.99 - -6.25 |
| \$35,000 - \$49,999                     | -9.55***  | -11.88 - -7.21 |
| \$50,000 - \$74,999                     | -11.08*** | -13.37 - -8.78 |
| \$75,000 or more                        | -12.22*** | -14.51 - -9.93 |
| Unknown                                 | -9.24***  | -11.73 - -6.75 |
| Did not report                          | -11.52*** | -13.99 - -9.05 |
| Employment status                       |           |                |
| Employed                                | Ref       |                |
| Self-employed                           | -0.06     | -1.08 - 0.95   |
| Out of work > 1 year                    | 12.02***  | 9.46 - 14.58   |
| Out of work < 1 year                    | 7.95***   | 5.58 - 10.32   |
| Homemaker                               | -0.78     | -2.08 - 0.52   |
| Student                                 | 0.05      | -1.83 - 1.92   |
| Retired                                 | 2.58***   | 1.37 - 3.78    |
| Unable to work                          | 26.22***  | 24.52 - 27.92  |
| Unknown                                 | 3.01      | -0.93 - 6.95   |
| Marital status                          |           |                |
| Married                                 | Ref       |                |
| Divorced                                | 3.53***   | 2.50 - 4.56    |
| Widowed                                 | 6.28***   | 4.24 - 8.33    |
| Separated                               | 8.00***   | 5.43 - 10.57   |
| Never married                           | 0.54      | -0.48 - 1.55   |
| Unmarried couple                        | 2.99***   | 1.02 - 4.96    |
| Unknown                                 | -2.70     | -6.57 - 1.18   |
| Constant                                | 21.95***  | 18.71 - 25.19  |

Notes: \*p<0.1, \*\*p<0.05, \*\*\*p<0.01. Notes: \*p<0.1, \*\*p<0.05, \*\*\*p<0.01. The estimates were adjusted for each of the variables contained in the table.

**eTable 10: Change in mentally unhealthy days after implementation of laws permitting denial of services to same-sex couples (N=109,089)**

| Variable                                                              | Mentally unhealthy days | 95% Confidence Interval |
|-----------------------------------------------------------------------|-------------------------|-------------------------|
| Law permitting denial of services to same-sex couples                 | 0.00                    | -0.34 - 0.33            |
| Sexual minority                                                       | 1.48*                   | -0.01 - 2.97            |
| Law permitting denial of services to same-sex couples*sexual minority | 2.47**                  | 0.49 - 4.46             |
| Year                                                                  |                         |                         |
| 2014                                                                  | Ref                     |                         |
| 2015                                                                  | 0.05                    | -0.19 - 0.29            |
| 2016                                                                  | 0.30***                 | 0.08 - 0.51             |
| Year*sexual minority                                                  |                         |                         |
| 2014*sexual minority                                                  |                         |                         |
| 2015*sexual minority                                                  | -0.53                   | -1.94 - 0.87            |
| 2016*sexual minority                                                  | -0.01                   | -1.31 - 1.30            |
| State                                                                 |                         |                         |
| Delaware                                                              | Ref                     |                         |
| Idaho                                                                 | -0.40**                 | -0.73 - -0.06           |
| Indiana                                                               | 0.17                    | -0.16 - 0.50            |
| Michigan                                                              | 0.26                    | -0.12 - 0.65            |
| Nevada                                                                | 0.28                    | -0.15 - 0.71            |
| North Carolina                                                        | -0.32*                  | -0.70 - 0.06            |
| Ohio                                                                  | 0.21                    | -0.12 - 0.54            |
| Utah                                                                  | 0.01                    | -0.34 - 0.37            |
| Virginia                                                              | -0.13                   | -0.44 - 0.18            |
| State*sexual minority                                                 |                         |                         |
| Delaware*sexual minority                                              | Ref                     |                         |
| Idaho*sexual minority                                                 | 1.60*                   | -0.28 - 3.48            |
| Indiana*sexual minority                                               | 0.17                    | -1.41 - 1.75            |
| Michigan*sexual minority                                              | 0.58                    | -1.49 - 2.65            |
| Nevada*sexual minority                                                | 2.02**                  | 0.17 - 3.88             |
| North Carolina*sexual minority                                        | -0.46                   | -2.56 - 1.63            |
| Ohio*sexual minority                                                  | 1.58*                   | -0.15 - 3.31            |
| Utah*sexual minority                                                  | -0.66                   | -2.51 - 1.20            |
| Virginia*sexual minority                                              | 0.22                    | -1.28 - 1.71            |
| Race/ethnicity                                                        |                         |                         |
| Non-Hispanic White                                                    | Ref                     |                         |
| Non-Hispanic Black                                                    | -1.21***                | -1.47 - -0.95           |
| Non-Hispanic multiracial                                              | -0.64***                | -1.03 - -0.26           |
| Other race/ethnicity                                                  | 1.22***                 | 0.52 - 1.92             |
| Hispanic                                                              | -1.84***                | -2.17 - -1.51           |
| Unknown/other                                                         | -0.47                   | -1.13 - 0.20            |
| Sex                                                                   |                         |                         |
| Male                                                                  | Ref                     |                         |
| Female                                                                | 1.41***                 | 1.25 - 1.57             |
| Age group                                                             |                         |                         |
| 18-24                                                                 | Ref                     |                         |
| 25-34                                                                 | -0.06                   | -0.43 - 0.31            |
| 35-44                                                                 | -0.36*                  | -0.73 - 0.02            |
| 45-54                                                                 | -0.79***                | -1.16 - -0.43           |
| 55 - 64                                                               | -1.82***                | -2.19 - -1.45           |

|                                         |          |               |
|-----------------------------------------|----------|---------------|
| Educational attainment                  |          |               |
| Did not graduate high school            | Ref      |               |
| High school graduate                    | -0.89*** | -1.26 - -0.51 |
| Attended college/technical school       | -0.63*** | -1.00 - -0.25 |
| Graduated from college/technical school | -1.42*** | -1.79 - -1.05 |
| Unknown                                 | -2.11*** | -3.13 - -1.09 |
| Income group                            |          |               |
| < \$10,000                              |          |               |
| \$10,000 - \$14,999                     | Ref      |               |
| \$15,000 - \$19,999                     | -0.80**  | -1.51 - -0.09 |
| \$20,000 - \$24,999                     | -1.11*** | -1.77 - -0.45 |
| \$25,000 - \$34,999                     | -1.28*** | -1.90 - -0.66 |
| \$35,000 - \$49,999                     | -2.28*** | -2.87 - -1.70 |
| \$50,000 - \$74,999                     | -2.39*** | -2.97 - -1.82 |
| \$75,000 or more                        | -2.81*** | -3.38 - -2.24 |
| Unknown                                 | -3.24*** | -3.81 - -2.68 |
| Did not report                          | -2.45*** | -3.06 - -1.84 |
| Employment status                       |          |               |
| Employed                                | Ref      |               |
| Self-employed                           | -0.03    | -0.28 - 0.22  |
| Out of work > 1 year                    | 3.26***  | 2.61 - 3.91   |
| Out of work < 1 year                    | 2.19***  | 1.60 - 2.78   |
| Homemaker                               | -0.14    | -0.46 - 0.18  |
| Student                                 | 0.29     | -0.15 - 0.72  |
| Retired                                 | 0.62***  | 0.31 - 0.94   |
| Unable to work                          | 7.12***  | 6.70 - 7.53   |
| Unknown                                 | 0.93*    | -0.10 - 1.96  |
| Marital status                          |          |               |
| Married                                 | Ref      |               |
| Divorced                                | 0.97***  | 0.72 - 1.23   |
| Widowed                                 | 1.83***  | 1.30 - 2.36   |
| Separated                               | 2.29***  | 1.65 - 2.93   |
| Never married                           | 0.23*    | -0.02 - 0.49  |
| Unmarried couple                        | 0.73***  | 0.27 - 1.20   |
| Unknown                                 | -0.52    | -1.60 - 0.57  |
| Constant                                | 6.41***  | 5.62 - 7.20   |

Notes: \*p<0.1, \*\*p<0.05, \*\*\*p<0.01. Notes: \*p<0.1, \*\*p<0.05, \*\*\*p<0.01. The estimates were adjusted for each of the variables contained in the table.

**eFigure 1: Changes in mental distress over time in states that did and did not pass laws permitting denial of services to same-sex couples, 2012-2014**

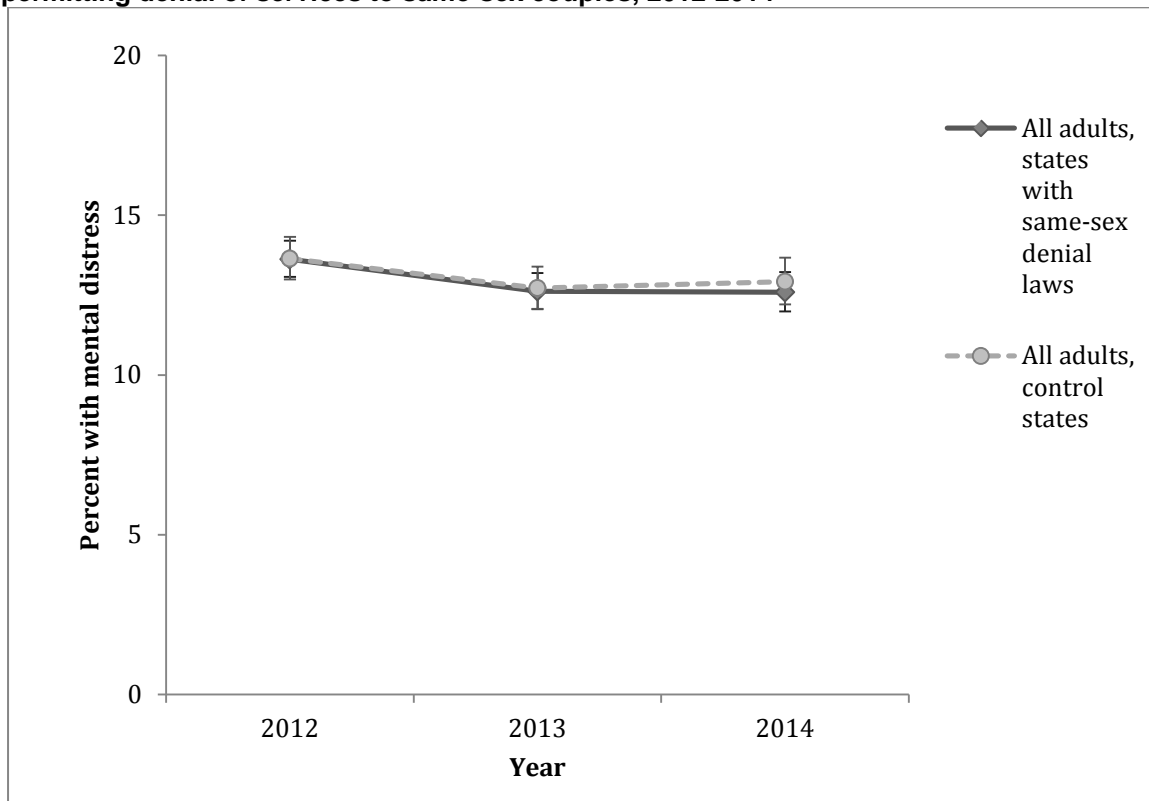

Note: The figure depicts that there were not pre-existing differences in mental distress time trends in states that did and did not go on to pass same-sex denial laws. Error bars depict 95% confidence intervals around estimates. Note that the scale of the y-axis differs from the main figure in order for error bars to be visible.
